# Supplementary material
Source: MDPI journal article supplement (https://www.mdpi.com/2073-4441/10/10/1328)

## Supporting information

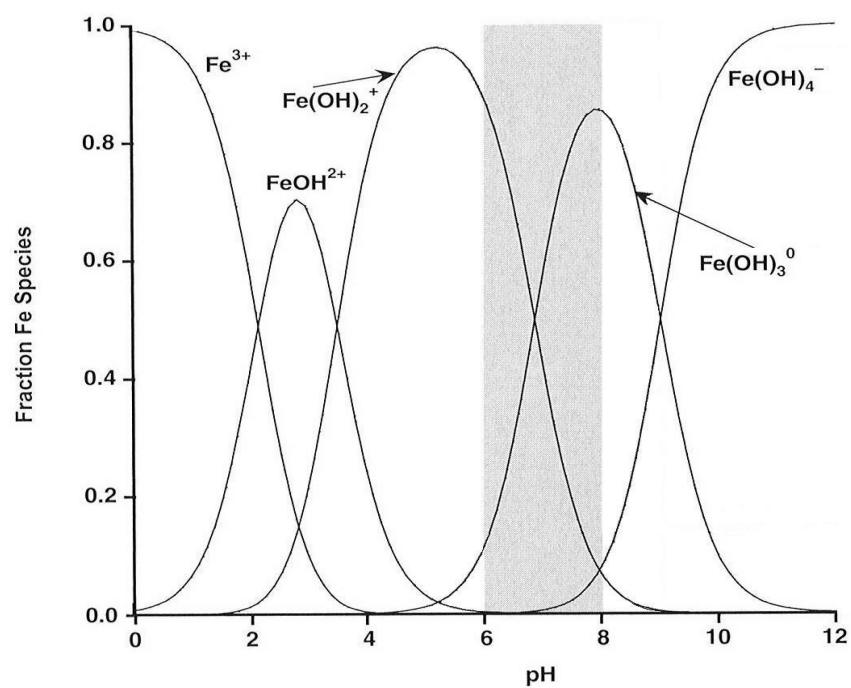

**Figure S1.** Fe(III) speciation as a function of water pH

Supplement: s1 [file s1]
